# Supplementary material
Source: MDPI journal article supplement (https://www.mdpi.com/2079-6412/11/6/724)
Supplement: s1 [file s1]

# High Pressure X-ray Diffraction as a Tool for Designing Doped Ceria Thin Films Electrolytes

Sara Massardo <sup>1</sup>, Alessandro Cingolani <sup>1</sup> and Cristina Artini <sup>1,2,\*</sup>

<sup>1</sup> Department of Chemistry and Industrial Chemistry, University of Genova, Via Dodecaneso 31, 16146 Genova, Italy; sara.massardo@edu.unige.it (S.M.); alessandro.cingolani.ac@gmail.com (A.C.)

<sup>2</sup> Institute of Condensed Matter Chemistry and Technologies for Energy, National Research Council, CNR-ICMATE, Via De Marini 6, 16149 Genova, Italy

\* Correspondence: artini@chimica.unige.it; Tel.: +39-010-353-56082

**Citation:** Massardo, S.; Cingolani, A.; Artini, C. High Pressure X-ray Diffraction as a Tool for Designing Doped Ceria Thin Films Electrolytes. *Coatings* **2021**, *11*, 724.  
<https://doi.org/10.3390/coatings11060724>

Academic Editor: Alberto Palmero

Received: 6 May 2021

Accepted: 12 June 2021

Published: 16 June 2021

**Publisher's Note:** MDPI stays neutral with regard to jurisdictional claims in published maps and institutional affiliations.

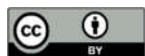

**Copyright:** © 2021 by the authors. Licensee MDPI, Basel, Switzerland. This article is an open access article distributed under the terms and conditions of the Creative Commons Attribution (CC BY) license (<http://creativecommons.org/licenses/by/4.0/>).

**Table S1.** Hybrid structural model compared to the F model typical of CeO<sub>2</sub> and the C model typical of sesquioxides of heavy rare earths, such as Tm<sub>2</sub>O<sub>3</sub>. Data of CeO<sub>2</sub> are taken from C. Artini et al. [1]; data of Tm<sub>2</sub>O<sub>3</sub> are taken from J.L. Blanus et al. [2].

| CeO <sub>2</sub><br>F structure<br><i>cF12 Fm-3m Z=4</i><br><i>a=5.4097(1) Å</i> |              |               | Ce <sub>1-x</sub> RE <sub>x</sub> O <sub>2-x/2</sub><br>Hybrid Model<br>for Rietveld Refinement<br>of Sample with <i>x=0.6</i><br><i>cI96 Ia-3 Z=32</i> |              |                                                                        | RE <sub>2</sub> O <sub>3</sub><br>C Structure<br><i>cI80 Ia-3 Z=16</i><br>for RE ≡ Tm, <i>a=10.4908(1) Å</i> |              |                                                                        |
|----------------------------------------------------------------------------------|--------------|---------------|---------------------------------------------------------------------------------------------------------------------------------------------------------|--------------|------------------------------------------------------------------------|--------------------------------------------------------------------------------------------------------------|--------------|------------------------------------------------------------------------|
| Atom                                                                             | Wyckoff site | Coordinates   | Atom                                                                                                                                                    | Wyckoff site | Coordinates                                                            | Atom                                                                                                         | Wyckoff site | Coordinates                                                            |
| Ce                                                                               | 4 <i>a</i>   | 0, 0, 0       | RE1                                                                                                                                                     | 24 <i>d</i>  | <i>x</i> , 0, 1/4<br><i>x</i> = 0.25                                   | RE1                                                                                                          | 24 <i>d</i>  | <i>x</i> , 0, 1/4<br><i>x</i> = 0.2839                                 |
|                                                                                  |              |               | RE2                                                                                                                                                     | 8 <i>a</i>   | 0, 0, 0                                                                | RE2                                                                                                          | 8 <i>a</i>   | 0, 0, 0                                                                |
| O                                                                                | 8 <i>c</i>   | 1/4, 1/4, 1/4 | O1                                                                                                                                                      | 48 <i>e</i>  | <i>x</i> , <i>y</i> , <i>z</i><br><i>x</i> = 0.125<br><i>y</i> = 0.375 | O                                                                                                            | 48 <i>e</i>  | <i>x</i> , <i>y</i> , <i>z</i><br><i>x</i> = 0.096<br><i>y</i> = 0.361 |
|                                                                                  |              |               |                                                                                                                                                         |              | <i>z</i> = 0.125                                                       |                                                                                                              |              | <i>z</i> = 0.129                                                       |
|                                                                                  |              |               | O2                                                                                                                                                      | 16 <i>c</i>  | <i>x</i> , <i>x</i> , <i>x</i><br><i>x</i> = 0.125                     | -                                                                                                            | -            | -                                                                      |

## References

1. Artini, C.; Pani, M.; Carnasciali, M.M.; Buscaglia, M.T.; Plaisier, J.R.; Costa, G.A. Structural features of Sm- and Gd-doped ceria studied by synchrotron X-ray diffraction and  $\mu$ -Raman spectroscopy. *Inorg. Chem.* **2015**, *54*, 4126–4137.
2. Blanus, J.; Mitric, M.; Rodic, D.; Szytula, A.; Slaski, M. An X-ray diffraction and magnetic susceptibility study of Tm<sub>x</sub>Y<sub>2-x</sub>O<sub>3</sub>. *J. Magn. Magn. Mater.* **2000**, *213*, 75–81.
